# Supplementary material for: The pht4;1-3 mutant line contains a loss of function allele in the Fatty Acid Desaturase 7 gene caused by a remnant inactivated selection marker—a cautionary tale
Source: PeerJ. 2017 Dec 1;5:e4134. doi: 10.7717/peerj.4134 (PMC5713625; doi:10.7717/peerj.4134)
Supplement: Data S2 — Figure 1A. Galactolipid species composition in wt and pht. A total lipid extract from the indicated lines was analysed by LC-MS/MS and the composition of MGDG and DGDG was determined. Table 1. Fatty acid composition of leaf tissue. Fatty acid methykl esters were obtained by direct alkaline transmethylation of leaf tissue and analyzed by GC-MS, fatty acids quantified as mol% [file peerj-05-4134-s002.xlsx]

## Sheet: Figure 1. Galaktolipid species
Figure 1A. Galactolipid species composition in wt and pht
A total lipid extract from the indicated lines was analysed by LC-MS/MS and the composition of MGDG and DGDG was determined.
Line	Ler	Ler	Ler	Ler	pht4.1 2	pht4.1 2	pht4.1 2	pht4.1 2	pht4.1 3	pht4.1 3	pht4.1 3	pht4.1 3
DGDG 34:2	3.20661	3.20872	3.19488	3.25075	3.19676	3.67732	4.02798	3.99735	6.93943	6.94393	8.31898	7.81944
DGDG 34:3	26.0327	27.4592	25.5976	26.8624	27.6531	28.6734	29.8472	28.1926	6.06772	6.39525	6.24064	6.90558
DGDG 34:4	1.04253	1.03153	1.03245	0.923522	1.1187	1.05032	1.25091	0.90095	5.74994	5.66013	6.83879	6.75264
DGDG 34:5	0.92319	0.966848	0.87077	0.920847	0.989037	1.14748	1.16033	0.984349	6.60057	6.47817	5.18587	6.00417
DGDG 34:6	8.30397	7.35428	6.94188	7.344	7.35155	6.10508	5.88742	5.5175	0.783063	0.78263	0.531722	0.771332
DGDG 36:4	2.19227	2.13578	2.18706	2.05356	2.13719	2.21637	2.35267	2.31334	13.0635	13.3628	16.5956	14.4831
DGDG 36:5	3.31151	2.38688	3.16396	2.98879	2.49563	2.64734	2.82077	2.6397	31.7824	31.3698	34.1158	30.9548
DGDG 36:6	54.9872	55.4568	57.0114	55.6561	55.058	54.4827	52.6528	55.4542	29.0135	29.0073	22.1725	26.3089
MGDG 34:3	2.89931	3.36061	3.08969	3.12544	3.56175	4.31785	4.2493	4.10057	3.10901	2.90394	3.99025	3.40917
MGDG 34:4	3.36493	4.171	3.72696	3.50684	4.07656	4.3237	5.36391	3.49571	31.7293	33.1088	37.1129	36.8676
MGDG 34:5	5.50803	5.30056	5.60514	5.35301	5.21863	5.04464	5.79096	4.00512	22.1676	21.4204	18.1521	19.709
MGDG 34:6	46.7025	44.6484	44.1186	46.0846	47.2712	44.7408	44.3663	46.5194	6.01991	5.61891	2.91641	4.07799
MGDG 36:4	2.17501	2.10369	2.28403	2.20778	2.17389	2.55522	2.67009	2.48603	13.0299	13.4136	15.36	13.5178
MGDG 36:5	6.34601	5.58897	6.59794	6.44037	5.50587	5.8458	5.55397	6.18252	15.5081	15.42	15.6219	15.1473
MGDG 36:6	33.0042	34.8268	34.5777	33.2819	32.1921	33.172	32.0054	33.2107	8.43611	8.11432	6.84637	7.27107

## Sheet: Table 1, Fatty acid profiles
Table 1. Fatty acid composition of leaf tissue.
Fatty acid methykl esters were obtained by direct alkaline transmethylation of leaf tissue and analyzed by GC-MS, fatty acids quantified as mol%
Line	Date	16:0 _	16:1(2) _	16:2 _	16:3 _	18:0 _	18:1(d9) _	18:2(d9,12) _	ALA _
Ler	2015-08-20	15.3468	1.64192	0.354013	13.6229	0.984369	2.1858	11.9043	53.9599
Ler	2015-08-20	15.4364	1.57862	0.428425	12.9815	1.11248	2.26485	11.2598	54.9379
PHT4.1-3	2015-08-20	14.5197	1.75726	12.0486	1.86603	0.895872	3.40381	31.0758	34.433
PHT4.1-3	2015-08-20	14.8811	1.84455	11.3325	1.92367	0.942454	3.32259	30.9619	34.7912
PHT4.1-2	2015-08-20	14.9778	1.94503	0.392352	13.6062	0.95098	2.09004	9.99426	56.0434
PHT4.1-2	2015-08-20	14.7219	1.98954	0.402726	13.8329	0.92447	2.27118	11.5394	54.3178
Ler	2015-11-12	15.3377	1.46278	0.527683	9.81974	1.74388	4.1534	16.0924	50.8624
Ler	2015-11-12	15.5707	1.14467	0.578345	9.6183	1.86246	3.82829	16.2213	51.1759
pht4.1-3	2015-11-12	14.5192	1.65009	7.49078	2.30036	1.49772	4.47081	29.1756	38.8954
pht4.1-3	2015-11-12	14.7044	1.78822	7.72199	2.64842	1.51761	4.71303	27.5276	39.3788
pht4.1-3	2015-11-12	15.6129	1.2771	7.35555	1.88569	1.4316	4.82195	29.0651	38.5501
Ler x pht4.1-3 F1	2015-11-12	15.6853	1.40746	1.11079	9.8231	1.59925	4.2769	16.9502	50.5544
Ler x pht4.1-3 F1	2015-11-12	15.5826	1.36374	1.25167	9.75851	1.6751	4.89742	17.5742	49.2604
01_Ler	2016-04-03	15.0505	1.51712	0.515424	11.6373	1.04007	3.4852	13.8982	66.1071
02_Ler	2016-04-04	14.5217	1.40746	0.522495	11.7885	1.01871	2.90712	13.9293	66.554
03_fad7	2016-04-05	12.225	1.36374	8.45332	1.65346	0.852251	4.03328	33.1849	38.9317
04_fad7	2016-04-06	11.9877	1.48563	8.6239	1.68021	0.770761	4.19532	32.9361	38.7502
05_pht4	2016-04-07	13.3832	1.23876	8.44218	1.42523	0.966536	4.45439	32.6168	39.8488
06_pht4	2016-04-08	13.3786	1.22018	8.68535	1.64799	1.00467	4.85755	30.3854	42.5828
07_fad7xpht4;1-3 F1#3	2016-04-09	13.0169	1.10434	7.92979	1.61955	1.38714	3.58481	32.0218	42.828
08_fad7xpht4;1-3 F1#3	2016-04-10	11.0942	1.29624	8.95056	1.62679	1.08583	3.96986	32.4368	39.7192
Ler	2016-02-22	12.939	1.74519	0.341635	11.2376	0.71729	2.59908	12.371	58.0493
pht4;1-3	2016-02-22	12.7862	1.53358	8.5683	1.94924	0.584964	4.52008	31.278	38.7797
Ler x pht4;1-3 F2.1, fad7	2016-02-22	12.6196	1.48674	8.6783	1.97363	0.689175	5.40414	29.5097	39.6387
Ler x pht4;1-3 F2.6, fad7	2016-02-22	12.5061	1.58026	8.82595	1.90964	0.746802	5.02618	30.8918	38.5133
Ler x pht4;1-3 F2.15, fad7	2016-02-22	12.069	1.46715	8.57895	2.00713	0.762429	4.90481	30.2252	39.9854
Ler x pht4;1-3 F2.9, FAD7	2016-02-22	12.3642	1.53818	2.4388	9.06721	0.82157	3.45096	18.1155	52.2036
Ler x pht4;1-3 F2.12, FAD7	2016-02-22	12.4578	1.59093	1.14736	10.3816	0.718784	2.76697	15.0425	55.894
Ler x pht4;1-3 F2.16, FAD7	2016-02-22	12.7153	1.48624	0.949059	9.7932	0.802802	3.69819	14.9121	55.6431
Ler x pht4;1-3 F2.17, FAD7	2016-02-22	12.8298	1.51036	0.440904	10.9056	0.844797	3.68314	12.885	56.9005
Ler x pht4;1-3 F2.19, FAD7	2016-02-22	12.9547	1.72133	0.322387	10.8431	0.781508	2.62833	13.1024	57.6463
